# Supplementary material
Source: PubMed Central journal article supplement (PMC6778733)
Supplement: NIHMS1049638-supplement-b.pdf [file NIHMS1049638-supplement-b.pdf]

Supplementary Information S1 (movie) | **Visualizing the conformational dynamics of bacterial HSP90 (HtpG).** In the absence of co-chaperones and lacking post-translational modifying enzymes, HtpG undergoes a conformational cycle in response to ATP binding and hydrolysis. The movie begins with HSP90 in the apo-form (no nucleotide present), and then proceeds to the ADP-bound extended state, then to the ATP-bound state in which N-domains transiently dimerize, then to a predicted compact ADP-bound form, and finally back to the apo state following release of nucleotide. The movie is taken from <sup>1</sup> with permission of the author (Dr. David Agard).

- 1 Shiao, A.K., Harris, S.F., Southworth, D.R. & Agard, D.A. Structural Analysis of *E. coli* HSP90 reveals dramatic nucleotide-dependent conformational rearrangements. *Cell* **127**, 329-40 (2006).
